# Supplementary material for: Visualizing Microorganism-Mineral Interaction in the Iberian Pyrite Belt Subsurface: The Acidovorax Case
Source: Front Microbiol. 2020 Nov 26;11:572104. doi: 10.3389/fmicb.2020.572104 (PMC7726209; doi:10.3389/fmicb.2020.572104)
Supplement: Supplementary file 1 [file Table_1.XLSX]

## Sheet: Hoja1
		Table S1. Mineral composition of the samples were Acidovorax was detected in Raman-FISH experiments
		Mineralogy
	Depth	Minerals	Percentage (%)
	121.8 m	Quartz	88.6
		Illite	11.11
	139.4 m	Quartz	73
		Pyrite	8.3
		Clinoclhore ferroan	18.75
	206.6 m	Quartz	76.3
		Pyrite	8.5
		Clinoclhore ferroan	15.25
	228.6 m	Quartz	74.5
		Pyrite	8.5
		Clinoclhore	17.1
	266.3 m	Quartz	95.7
		Illite	4.25
	284 m	Quartz	67.3
		Illite	27.8
		Pyrite	4.8
